# Supplementary material for: The beneficial effects of Lactobacillus brevis FZU0713-fermented Laminaria japonica on lipid metabolism and intestinal microbiota in hyperlipidemic rats fed with a high-fat diet
Source: Royal Society of Chemistry journal article supplement (doi:10.1039/d1fo00218j), 2021-01-01
Supplement: d1fo00218j1.pdf [file d1fo00218j1.pdf]

### Supplementary material

**Table S1.** Dietary energy distribution of the normal-fat diet (NFD, #D12450B) and high-fat diet (HFD, #D12451) purchased from Research Diets Co. Ltd. (New Brunswick, NJ, USA).

| <b>Nutritional Components</b> | <b>Normal-fat diet (10% dietary fat)</b> | <b>High-fat diet (45% dietary fat)</b> |
|-------------------------------|------------------------------------------|----------------------------------------|
| Protein                       | 20                                       | 20                                     |
| Carbohydrate                  | 70                                       | 35                                     |
| Fat                           | 10                                       | 45                                     |
| Total kcal/g                  | 100                                      | 100                                    |

**Table S2.** Composition of the normal-fat diet (NFD, #D12450B) and high-fat diet (HFD, #D12451) used in the animal experiment.

| Ingredients         | Normal-fat diet (10% dietary fat) |      | High-fat diet (45% dietary fat) |      |
|---------------------|-----------------------------------|------|---------------------------------|------|
|                     | g                                 | kcal | g                               | kcal |
| Casein, 30 mesh     | 200                               | 800  | 200                             | 800  |
| L-cystine           | 3                                 | 12   | 3                               | 12   |
| Corn starch         | 315                               | 1260 | 72.8                            | 291  |
| Maltodextrin 10     | 35                                | 140  | 100                             | 400  |
| Sucrose             | 350                               | 1400 | 172.8                           | 691  |
| Cellulose, BW200    | 50                                | 0    | 50                              | 0    |
| Soybean oil         | 25                                | 225  | 25                              | 225  |
| Lard                | 20                                | 180  | 177.5                           | 1598 |
| Mineral mix S10026  | 10                                | 0    | 10                              | 0    |
| Dicalcium phosphate | 13                                | 0    | 13                              | 0    |
| Calcium carbonate   | 5.5                               | 0    | 5.5                             | 0    |
| Potassium citrate   | 16.5                              | 0    | 16.5                            | 0    |
| Vitamin mix V10001  | 10                                | 40   | 10                              | 40   |
| Choline bitartrate  | 2                                 | 0    | 2                               | 0    |
| FD&C yellow dye     | 0.05                              | 0    | -                               | -    |
| FD&C red dye        | -                                 | -    | 0.05                            | 0    |

**Table S3.** The nutrients, non-nutrients composition in *Laminaria japonica* medium (3%) before and after *Lactobacillus brevis* FZU0713 fermentation

| Composition         | Content (unit per 100 mL medium) |                    |
|---------------------|----------------------------------|--------------------|
|                     | Before fermentation              | After fermentation |
| Protein             | 0.246 g                          | 1.32 g             |
| Carbohydrate        | 1.752 g                          | 1.340 g            |
| Lipids              | 0.015 g                          | 0.036 g            |
| Total dietary fiber | 0.336 g                          | 0.108 g            |
| Vitamin A           | 0.12 mg                          | 0.08 mg            |
| Vitamin E           | 0.026 mg                         | 0.018 mg           |
| Total carotenoids   | 0.017 mg                         | 0.023 mg           |
| K                   | 5.34 mg                          | 1.80 mg            |
| Na                  | 8.59 mg                          | 6.60 mg            |
| Ca                  | 3.0 mg                           | 0.6 mg             |
| Mg                  | 4.56 mg                          | 2.56 mg            |
| Se                  | 0.17 µg                          | 0.08 µg            |
| P                   | 7.38 mg                          | 5.38 mg            |
| I                   | 1.08 mg                          | 0.76 mg            |
| Lactic acid         | -                                | 0.680 g            |
| Acetic acid         | -                                | 0.142 g            |
| Propionic acid      | -                                | 0.024 g            |
| Butyric acid        | -                                | 0.020 g            |
